# Supplementary material for: Comprehensive Multi-Omics Analysis Reveals Aberrant Metabolism of Epstein–Barr-Virus-Associated Gastric Carcinoma
Source: PubMed Central journal article supplement (PMC6829863; doi:10.3390/cells8101220), 2019-10-08
Supplement: cells-08-01220-s001.pdf [file cells-08-01220-s001.pdf]

## <Supplementary Materials>

# Comprehensive Multi-Omics Analysis Reveals Aberrant Metabolism of Epstein–Barr-Virus-Associated Gastric Carcinoma

Sang Jun Yoon <sup>1,†</sup>, Jun Yeob Kim <sup>2,†</sup>, Nguyen Phuoc Long <sup>1</sup>, Jung Eun Min <sup>1</sup>, Hyung Min Kim <sup>1</sup>, Jae Hee Yoon <sup>2</sup>, Nguyen Hoang Anh <sup>1</sup>, Myung Chan Park <sup>2</sup>, Sung Won Kwon <sup>1,\*</sup> and Suk Kyeong Lee <sup>2,\*</sup>

<sup>1</sup> College of Pharmacy, Seoul National University, Seoul 08826, Korea; supercanboy@snu.ac.kr (S.J.Y.); phuoclong@snu.ac.kr (N.P.L.); mje0107@snu.ac.kr (J.E.M.) snuhmkim04@snu.ac.kr (H.M.K.); 2018-23140@snu.ac.kr (N.H.A.)

<sup>2</sup> Department of Medical Life Sciences, Department of Biomedicine & Health Sciences, College of Medicine, The Catholic University of Korea, Seoul 06591, Korea; kjpgod1@catholic.ac.kr (J.Y.K.); yjh823@catholic.ac.kr (J.H.Y.); pmcreg@catholic.ac.kr (M.C.P.)

\* Correspondence: suklee@catholic.ac.kr (S.K.L.); swkwon@snu.ac.kr (S.W.K.); Tel.: +82-0-2258-7480 (S.K.L.); Tel.: +82-2-880-7844 (S.W.K.); Fax.: +82-504-201-2396 (S.K.L.); Fax.: +82-2-886-7844 (S.W.K.)

† These authors contributed equally to this work.

Received: date; Accepted: date; Published: date

## Table of Contents

**Table S1:** Downregulated genes that code metabolic enzymes and metabolic regulators in EBVaGC.

**Table S2:** Polar metabolites that differed significantly between AGS-EBV and AGS cells.

**Table S3:** Pathway analysis based on differences in polar metabolites between EBVaGC and EBVnGC.

**Figure S1:** Real-time RT-PCR to validate the *in vitro* EBVaGC model.

**Figure S2:** Kaplan–Meier survival plots of gastric cancer (GC) for metabolic genes significantly downregulated in EBVaGC.

**Figure S3:** Heatmap of pathway enrichment analysis based on lipids significantly altered in EBVaGC.

**Figure S4:** Metabolic pathways with transcripts significantly downregulated and metabolites altered by EBV infection in gastric cancer.

**Table S1.** Downregulated genes that code metabolic enzymes and metabolic regulators in EBVaGC.

|    | Gene ID           | Origin of the Gene | Related metabolism                                                                                                    | p-value                |
|----|-------------------|--------------------|-----------------------------------------------------------------------------------------------------------------------|------------------------|
| 1  | <i>ACACA</i> *    | Tissue             | "Metabolic pathways"                                                                                                  | 1.39×10 <sup>-5</sup>  |
| 2  | <i>ACOT1</i> *    | Cell line          | "Metabolic pathways"                                                                                                  | 5.35×10 <sup>-13</sup> |
| 3  | <i>ACOT2</i> *    | Cell line          | "Metabolic pathways"                                                                                                  | 2.67×10 <sup>-9</sup>  |
| 4  | <i>ACY1</i>       | Tissue             | "Metabolic pathways"                                                                                                  | 1.46×10 <sup>-4</sup>  |
| 5  | <i>ALDH1A1</i> *  | Cell line          | "Metabolic pathways"                                                                                                  | 4.84×10 <sup>-11</sup> |
| 6  | <i>ALDH2</i>      | Cell line          | "Metabolic pathways," "Arginine and proline metabolism," "Ascorbate and aldarate metabolism," "Tryptophan metabolism" | 2.61×10 <sup>-6</sup>  |
| 7  | <i>ALDOC</i>      | Tissue             | "Metabolic pathways," "Fructose and mannose metabolism," "Pentose phosphate pathway"                                  | 1.93×10 <sup>-5</sup>  |
| 8  | <i>ALG9</i>       | Cell line          | "Metabolic pathways"                                                                                                  | 1.56×10 <sup>-11</sup> |
| 9  | <i>ARG2</i> *     | Tissue             | "Metabolic pathways"                                                                                                  | 3.63×10 <sup>-5</sup>  |
| 10 | <i>B4GALNT1</i> * | Tissue             | "Metabolic pathways"                                                                                                  | 1.66×10 <sup>-4</sup>  |
| 11 | <i>B4GALNT4</i> * | Tissue             | "Metabolic pathways"                                                                                                  | 2.38×10 <sup>-6</sup>  |
| 12 | <i>CKMT1A</i> *   | Cell line          | "Metabolic pathways," "Arginine and proline metabolism"                                                               | 9.98×10 <sup>-9</sup>  |
| 13 | <i>CKMT1B</i> *   | Cell line          | "Metabolic pathways," "Arginine and proline metabolism"                                                               | 3.81×10 <sup>-9</sup>  |
| 14 | <i>CYP2J2</i>     | Cell line          | "Metabolic pathways," "Linoleic acid metabolism," "Arachidonic acid metabolism"                                       | 1.74×10 <sup>-12</sup> |
| 15 | <i>DDC</i>        | Cell line          | "Metabolic pathways," "Tryptophan metabolism," "Phenylalanine metabolism"                                             | 1.60×10 <sup>-9</sup>  |
| 16 | <i>DHCR24</i>     | Cell line          | "Metabolic pathways"                                                                                                  | 3.15×10 <sup>-7</sup>  |
| 17 | <i>ETNK2</i> *    | Tissue             | "Metabolic pathways"                                                                                                  | 1.44×10 <sup>-4</sup>  |
| 18 | <i>EXT1</i> *     | Cell line          | "Metabolic pathways"                                                                                                  | 6.92×10 <sup>-11</sup> |
| 19 | <i>FAH</i> *      | Tissue             | "Metabolic pathways"                                                                                                  | 2.15×10 <sup>-7</sup>  |
| 20 | <i>FASN</i> *     | Tissue             | "Metabolic pathways"                                                                                                  | 8.81×10 <sup>-7</sup>  |
| 21 | <i>FUT4</i> *     | Cell line          | "Metabolic pathways"                                                                                                  | 2.40×10 <sup>-12</sup> |
| 22 | <i>GALC</i> *     | Cell line          | "Metabolic pathways"                                                                                                  | 9.37×10 <sup>-16</sup> |
| 23 | <i>GALNT5</i>     | Cell line          | "Metabolic pathways"                                                                                                  | 2.38×10 <sup>-10</sup> |
| 24 | <i>GALNT6</i>     | Cell line          | "Metabolic pathways"                                                                                                  | 1.56×10 <sup>-11</sup> |
| 25 | <i>GATM</i>       | Cell line          | "Metabolic pathways," "Arginine and proline metabolism"                                                               | 5.27×10 <sup>-10</sup> |

|    |                 |           |                                                                                                                                                                                |                        |
|----|-----------------|-----------|--------------------------------------------------------------------------------------------------------------------------------------------------------------------------------|------------------------|
| 26 | <i>GCNT3</i>    | Cell line | "Metabolic pathways"                                                                                                                                                           | $4.12 \times 10^{-4}$  |
| 27 | <i>GDA*</i>     | Cell line | "Metabolic pathways"                                                                                                                                                           | $5.70 \times 10^{-12}$ |
| 28 | <i>HMOX1</i>    | Cell line | "Metabolic pathways"                                                                                                                                                           | $4.62 \times 10^{-9}$  |
| 29 | <i>HSD17B2*</i> | Cell line | "Metabolic pathways"                                                                                                                                                           | $1.22 \times 10^{-9}$  |
| 30 | <i>HSD17B7*</i> | Tissue    | "Metabolic pathways"                                                                                                                                                           | $1.28 \times 10^{-4}$  |
| 31 | <i>HSD3B1*</i>  | Cell line | "Metabolic pathways"                                                                                                                                                           | $1.23 \times 10^{-10}$ |
| 32 | <i>IMPAD1</i>   | Cell line | "Metabolic pathways"                                                                                                                                                           | $8.05 \times 10^{-6}$  |
| 33 | <i>ISYNA1</i>   | Tissue    | "Metabolic pathways"                                                                                                                                                           | $8.63 \times 10^{-5}$  |
| 34 | <i>LIPG*</i>    | Cell line | "Metabolic pathways"                                                                                                                                                           | $1.33 \times 10^{-10}$ |
| 35 | <i>LPIN2*</i>   | Cell line | "Metabolic pathways," "Glycerophospholipid metabolism"                                                                                                                         | $2.19 \times 10^{-8}$  |
| 36 | <i>MAOA</i>     | Cell line | "Metabolic pathways," "Arginine and proline metabolism," "Tryptophan metabolism," "Phenylalanine metabolism"                                                                   | $3.47 \times 10^{-6}$  |
| 37 | <i>ME1*</i>     | Tissue    | "Metabolic pathways"                                                                                                                                                           | $1.07 \times 10^{-4}$  |
| 38 | <i>MGAT4A*</i>  | Cell line | "Metabolic pathways"                                                                                                                                                           | $5.62 \times 10^{-9}$  |
| 39 | <i>NAG5*</i>    | Tissue    | "Metabolic pathways"                                                                                                                                                           | $9.01 \times 10^{-5}$  |
| 40 | <i>NME7</i>     | Tissue    | "Metabolic pathways"                                                                                                                                                           | $3.24 \times 10^{-5}$  |
| 41 | <i>PCYT2*</i>   | Cell line | "Metabolic pathways," "Glycerophospholipid metabolism"                                                                                                                         | $2.80 \times 10^{-6}$  |
| 42 | <i>PFKM*</i>    | Tissue    | "Metabolic pathways," "Fructose and mannose metabolism," "Pentose phosphate pathway"                                                                                           | $1.69 \times 10^{-4}$  |
| 43 | <i>PGM1</i>     | Cell line | "Metabolic pathways," "Amino sugar and nucleotide sugar metabolism"                                                                                                            | $1.88 \times 10^{-11}$ |
| 44 | <i>PLA2G16*</i> | Cell line | "Metabolic pathways," "Linoleic acid metabolism," "Arachidonic acid metabolism," "alpha-Linolenic acid metabolism," "Glycerophospholipid metabolism," "Ether lipid metabolism" | $9.11 \times 10^{-8}$  |
| 45 | <i>PLA2G2A</i>  | Cell line | "Metabolic pathways," "Linoleic acid metabolism," "Arachidonic acid metabolism," "alpha-Linolenic acid metabolism," "Glycerophospholipid metabolism," "Ether lipid metabolism" | $7.10 \times 10^{-8}$  |
| 46 | <i>PLA2G4A*</i> | Cell line | "Metabolic pathways," "Linoleic acid metabolism," "Arachidonic acid metabolism," "alpha-Linolenic acid metabolism," "Glycerophospholipid metabolism," "Ether lipid metabolism" | $2.20 \times 10^{-7}$  |
| 47 | <i>PNMT</i>     | Tissue    | "Metabolic pathways," "Tyrosine metabolism"                                                                                                                                    | $7.77 \times 10^{-7}$  |
| 48 | <i>PTGS2*</i>   | Cell line | "Metabolic pathways," "Arachidonic acid metabolism"                                                                                                                            | $1.71 \times 10^{-8}$  |
| 49 | <i>PYCR1*</i>   | Tissue    | "Metabolic pathways"                                                                                                                                                           | $8.91 \times 10^{-5}$  |
| 50 | <i>RENBP</i>    | Cell line | "Metabolic pathways," "Amino sugar and nucleotide sugar metabolism"                                                                                                            | $2.94 \times 10^{-7}$  |
| 51 | <i>RGN*</i>     | Cell line | "Metabolic pathways," "Ascorbate and aldarate metabolism"                                                                                                                      | $2.62 \times 10^{-14}$ |
| 52 | <i>SDHD</i>     | Cell line | "Metabolic pathways"                                                                                                                                                           | $3.68 \times 10^{-7}$  |

|    |                     |           |                                                                     |                        |
|----|---------------------|-----------|---------------------------------------------------------------------|------------------------|
| 53 | <i>SQLE</i> *       | Tissue    | "Metabolic pathways"                                                | $1.92 \times 10^{-4}$  |
| 54 | <i>ST6GALNAC3</i> * | Cell line | "Metabolic pathways"                                                | $5.53 \times 10^{-10}$ |
| 55 | <i>UAP1L1</i> *     | Cell line | "Metabolic pathways," "Amino sugar and nucleotide sugar metabolism" | $4.65 \times 10^{-6}$  |
| 56 | <i>UCK2</i>         | Tissue    | "Metabolic pathways"                                                | $2.04 \times 10^{-5}$  |
| 57 | <i>UGT1A6</i>       | Cell line | "Metabolic pathways," "Ascorbate and aldarate metabolism"           | $2.92 \times 10^{-14}$ |
| 58 | <i>XYLB</i>         | Tissue    | "Metabolic pathways"                                                | $1.12 \times 10^{-4}$  |

\* Genes that significantly affect the survival rate of gastric cancer patients.

**Table S2.** Polar metabolites that differed significantly between AGS-EBV and AGS cells ( $P$ -value  $\leq 0.05$ , FDR  $< 0.1$ ). ▲: up-regulated in EBVaGC compared to control; ▼: down-regulated in EBVaGC compared to control.

|    | Metabolites                 | KEGG ID | HMDB ID     | Expression | Platform |
|----|-----------------------------|---------|-------------|------------|----------|
| 1  | 2-Aminomalonic acid         | C00872  | HMDB0001147 | ▲          | GC       |
| 2  | 4-Aminobutanoic acid        | C00334  | HMDB0000112 | ▲          | LC/GC    |
| 3  | 4-Hydroxyproline            | C01157  | HMDB0000725 | ▲          | LC       |
| 4  | Adenosine                   | C00212  | HMDB0000050 | ▲          | LC       |
| 5  | Allantoate                  | C00499  | HMDB0001209 | ▲          | LC       |
| 6  | AMP                         | C00020  | HMDB0000045 | ▲          | LC       |
| 7  | Arachidonic acid            | C00219  | HMDB0001043 | ▲          | GC       |
| 8  | Biotin                      | C00120  | HMDB0000030 | ▲          | LC       |
| 9  | Boric acid                  | C12486  | HMDB0035731 | ▲          | GC       |
| 10 | carbamate                   | C01563  | HMDB0003551 | ▲          | GC       |
| 11 | Carnitine                   | C00487  | HMDB0000062 | ▼          | LC       |
| 12 | Cholesterol                 | C00187  | HMDB0000067 | ▼          | GC       |
| 13 | Cholesteryl sulfate         | C18043  | HMDB0000653 | ▼          | LC       |
| 14 | Citric acid                 | C00158  | HMDB0000094 | ▼          | LC       |
| 15 | CMP                         | C00055  | HMDB0000095 | ▲          | LC       |
| 16 | Creatine                    | C00300  | HMDB0000064 | ▼          | LC       |
| 17 | Creatinine                  | C00300  | HMDB0000064 | ▼          | LC/GC    |
| 18 | Cytidine                    | C00475  | HMDB0000089 | ▲          | LC       |
| 19 | Cytosine                    | C00380  | HMDB0000630 | ▲          | LC       |
| 20 | dAMP                        | C00360  | HMDB0000905 | ▲          | LC       |
| 21 | Deoxyadenosine              | C00559  | HMDB0000101 | ▲          | LC       |
| 22 | D-Erythrotetrofuranose      |         |             | ▼          | GC       |
| 23 | dGMP                        | C00362  | HMDB0001044 | ▲          | LC       |
| 24 | dGTP                        | C00286  | HMDB0001440 | ▼          | LC       |
| 25 | Dihydroxy-acetone-phosphate | C00111  | HMDB0001473 | ▼          | LC       |
| 26 | D-Lactose                   | C00243  | HMDB0000186 | ▼          | GC       |
| 27 | dTMP                        | C00364  | HMDB0001227 | ▲          | LC       |
| 28 | Ethanolamine                | C00189  | HMDB0000149 | ▲          | LC       |
| 29 | FAD                         | C00189  | HMDB0000149 | ▼          | LC       |
| 30 | Folate                      | C00504  | HMDB0000121 | ▲          | LC       |
| 31 | Fructose-1,6-bisphosphate   | C05378  | HMDB0001058 | ▼          | LC       |
| 32 | Fumaric acid                | C00122  | HMDB0000134 | ▼          | GC       |
| 33 | Geranyl-PP                  | C00341  | HMDB0001285 | ▲          | LC       |
| 34 | Glutathione                 | C00051  | HMDB0000125 | ▼          | LC       |
| 35 | Glutathione disulfide       | C00127  | HMDB0003337 | ▼          | LC       |
| 36 | Glycerophosphocholine       | C00670  | HMDB0000086 | ▲          | LC       |
| 37 | GMP                         | C00144  | HMDB0001397 | ▲          | LC       |
| 38 | Guanine                     | C00242  | HMDB0000132 | ▲          | LC       |
| 39 | Hexanoic acid               | C01585  | HMDB0000535 | ▲          | GC       |
| 40 | Histidine                   | C00135  | HMDB0000177 | ▲          | LC       |
| 41 | Imidazoleacetic acid        | C02835  | HMDB0002024 | ▼          | LC       |
| 42 | IMP                         | C00130  | HMDB0000175 | ▲          | LC       |
| 43 | Inosine                     | C00294  | HMDB0000195 | ▼          | LC       |
| 44 | Lactic Acid                 | C01432  | HMDB0000190 | ▼          | LC/GC    |
| 45 | L-Alanine                   | C00041  | HMDB0000161 | ▲          | LC/GC    |
| 46 | L-Asparagine                | C00152  | HMDB0000168 | ▲          | GC       |
| 47 | L-Aspartate                 | C00049  | HMDB0000191 | ▲          | LC/GC    |
| 48 | L-Cysteine                  | C00097  | HMDB0000574 | ▼          | GC       |
| 49 | L-Glutamate                 | C00025  | HMDB0000148 | ▲          | LC/GC    |
| 50 | L-Glycine                   | C00037  | HMDB0000123 | ▲          | LC/GC    |
| 51 | L-isoleucine                | C00407  | HMDB0000172 | ▲          | LC/GC    |
| 52 | L-Leucine                   | C00123  | HMDB0000687 | ▲          | LC/GC    |
| 53 | L-Serine                    | C00065  | HMDB0000187 | ▲          | GC       |
| 54 | L-Threonine                 | C00188  | HMDB0000167 | ▲          | LC       |
| 55 | L-Tyrosine                  | C00082  | HMDB0000158 | ▲          | GC       |
| 56 | L-Valine                    | C00183  | HMDB0000883 | ▲          | GC       |

|    |                              |        |             |   |       |
|----|------------------------------|--------|-------------|---|-------|
| 57 | Maleic acid                  | C01384 | HMDB0000176 | ▼ | LC    |
| 58 | Malic acid                   | C00149 | HMDB0000156 | ▼ | GC    |
| 59 | Methionine sulfoxide         | C02989 | HMDB0002005 | ▲ | LC    |
| 60 | Methylcysteine               |        | HMDB0002108 | ▲ | LC    |
| 61 | Myo-Inositol                 | C00137 | HMDB0000211 | ▲ | GC    |
| 62 | N-Acetylputrescine           | C02714 | HMDB0002064 | ▲ | LC    |
| 63 | NAD+                         | C00003 | HMDB0000902 | ▲ | LC    |
| 64 | NADH                         | C00004 | HMDB0001487 | ▲ | LC    |
| 65 | NADP+                        | C00006 | HMDB0000217 | ▲ | LC    |
| 66 | N-carbamoyl-L-aspartate      | C00438 | HMDB0000828 | ▲ | LC    |
| 67 | Nicotinamide                 | C00153 | HMDB0001406 | ▲ | LC    |
| 68 | Oleic Acid                   | C00712 | HMDB0000207 | ▲ | GC    |
| 69 | Ornithine                    | C00077 | HMDB0000214 | ▼ | LC    |
| 70 | Palmitelaidic acid           |        | HMDB0012328 | ▲ | GC    |
| 71 | Pantothenic acid             | C00864 | HMDB0000210 | ▲ | LC/GC |
| 72 | Phosphoenolpyruvate          | C00074 | HMDB0000263 | ▼ | LC    |
| 73 | Phosphoric acid              | C00009 | HMDB0001429 | ▼ | GC    |
| 74 | Phosphorylethanolamine       | C00346 | HMDB0000224 | ▲ | GC    |
| 75 | p-Hydroxybenzoate            | C00156 | HMDB0000500 | ▼ | LC    |
| 76 | Pipecolic acid               | C00408 | HMDB0000070 | ▼ | LC    |
| 77 | Putrescine                   | C00134 | HMDB0001414 | ▲ | GC    |
| 78 | Pyridoxine                   | C00314 | HMDB0000239 | ▼ | LC    |
| 79 | Pyroglutamic acid            | C01879 | HMDB0000267 | ▲ | GC    |
| 80 | Pyrophosphate                | C00013 | HMDB0000250 | ▼ | GC    |
| 81 | Sarcosine                    | C00213 | HMDB0000271 | ▼ | LC    |
| 82 | Shikimate-3-phosphate        | C03175 |             | ▲ | LC    |
| 83 | Succinate/Methylmalonic acid | C02170 | HMDB0000202 | ▲ | LC    |
| 84 | Succinic acid                | C00042 | HMDB0000254 | ▲ | GC    |
| 85 | Trehalose-6-Phosphate        | C00689 | HMDB0001124 | ▲ | LC    |
| 86 | UMP                          | C00105 | HMDB0000288 | ▲ | LC    |
| 87 | Xanthine                     | C00385 | HMDB0000292 | ▼ | LC    |
| 88 | $\alpha$ -Ketoglutarate      | C00940 | HMDB0001552 | ▼ | LC    |

**Table S3.** Pathway analysis based on differences in polar metabolites between EBVaGC and EBVnGC.

|    | Pathway name                                 | Total | Expected | Hits | Raw <i>p</i> -value   | FDR                   | Impact  |
|----|----------------------------------------------|-------|----------|------|-----------------------|-----------------------|---------|
| 1  | Alanine, aspartate, and glutamate metabolism | 24    | 0.81     | 9    | 3.07×10 <sup>-8</sup> | 2.46×10 <sup>-6</sup> | 0.67806 |
| 2  | Aminoacyl-tRNA biosynthesis                  | 75    | 2.52     | 13   | 6.32×10 <sup>-7</sup> | 2.53×10 <sup>-5</sup> | 0.16902 |
| 3  | Glutathione metabolism                       | 38    | 1.28     | 9    | 2.61×10 <sup>-6</sup> | 6.95×10 <sup>-5</sup> | 0.27861 |
| 4  | Purine metabolism                            | 92    | 3.10     | 13   | 7.03×10 <sup>-6</sup> | 1.41×10 <sup>-4</sup> | 0.2973  |
| 5  | Nitrogen metabolism                          | 39    | 1.31     | 8    | 3.06×10 <sup>-5</sup> | 4.90×10 <sup>-4</sup> | 0.07895 |
| 6  | Arginine and proline metabolism              | 77    | 2.59     | 10   | 1.86×10 <sup>-4</sup> | 2.48×10 <sup>-3</sup> | 0.35026 |
| 7  | Citrate cycle (TCA cycle)                    | 20    | 0.67     | 5    | 3.97×10 <sup>-4</sup> | 4.54×10 <sup>-3</sup> | 0.13818 |
| 8  | Nicotinate and nicotinamide metabolism       | 44    | 1.48     | 7    | 5.27×10 <sup>-4</sup> | 5.27×10 <sup>-3</sup> | 0.0482  |
| 9  | Glycine, serine, and threonine metabolism    | 48    | 1.62     | 7    | 9.08×10 <sup>-4</sup> | 8.07×10 <sup>-3</sup> | 0.47083 |
| 10 | Cyanoamino acid metabolism                   | 16    | 0.54     | 4    | 1.59×10 <sup>-3</sup> | 0.013                 | 0       |
| 11 | Pyrimidine metabolism                        | 60    | 2.02     | 7    | 3.44×10 <sup>-3</sup> | 0.025                 | 0.23504 |
| 12 | Butanoate metabolism                         | 40    | 1.35     | 5    | 9.95×10 <sup>-3</sup> | 0.066                 | 0.0663  |
| 13 | Valine, leucine, and isoleucine biosynthesis | 27    | 0.91     | 4    | 0.012                 | 0.066                 | 0.03975 |
| 14 | Pantothenate and CoA biosynthesis            | 27    | 0.91     | 4    | 0.012                 | 0.066                 | 0.18014 |
| 15 | beta-Alanine metabolism                      | 28    | 0.91     | 4    | 0.013                 | 0.070                 | 0       |



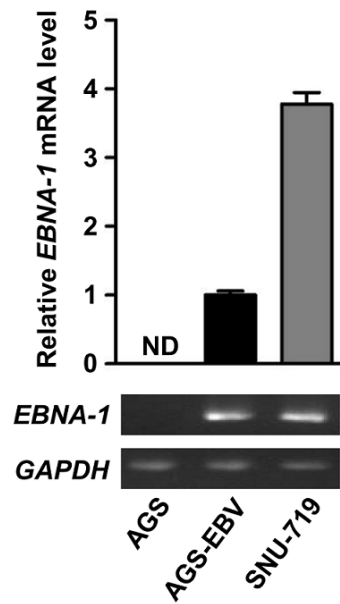

**Figure S1.** Real-time RT-PCR to validate the *in vitro* EBVaGC model. Real-time RT-PCR analysis of *EBNA-1* mRNA was carried out using a SYBR green qPCR kit. SNU-719, a gastric cancer cell line naturally infected with EBV, was used as a positive control for EBV infection. *EBNA-1* mRNA was chosen to confirm EBV infection because it is known to be expressed in all EBV-infected cells. *GAPDH* was used as an internal control. Similar results were obtained in two additional independent real-time RT-PCR experiments, and the means  $\pm$  SD from all three experiments are presented in the upper panel ( $n = 3$ ). After the real-time RT-PCR reaction, the PCR products were electrophoresed on a 2% agarose gel to visualize the amplicons, as shown in the lower panel. For AGS cells, we could not detect *EBNA-1* expression. ND = not detected.

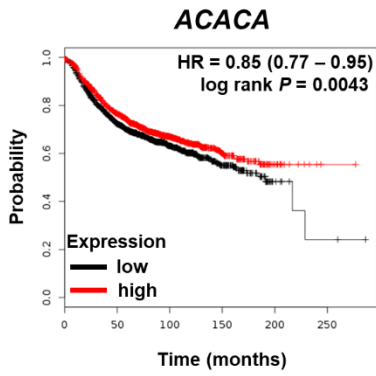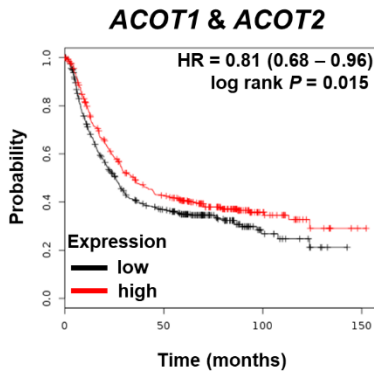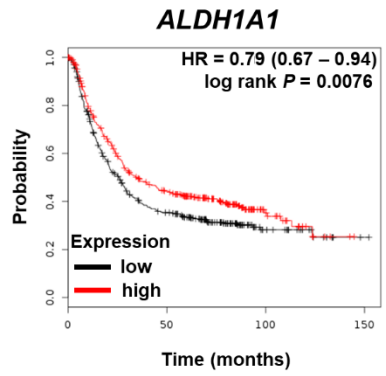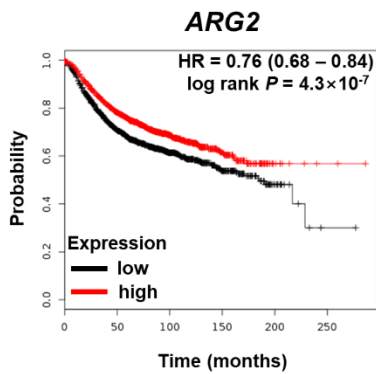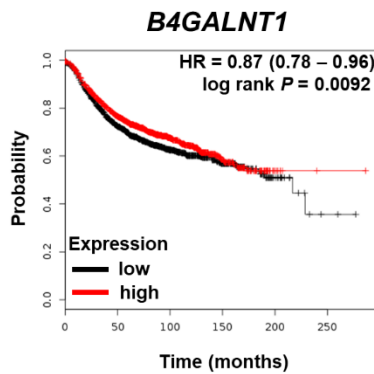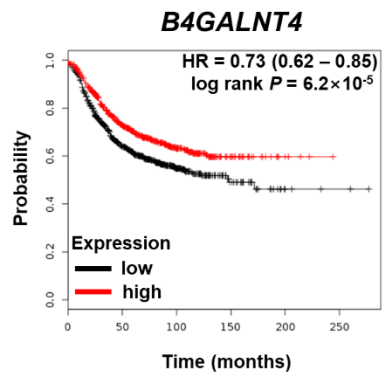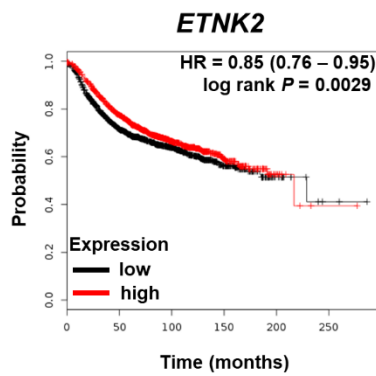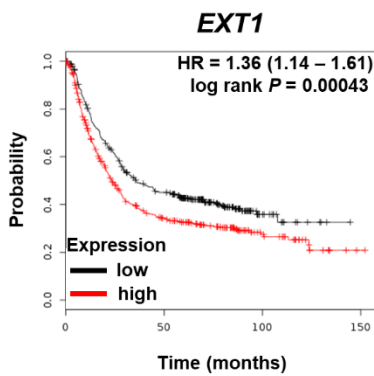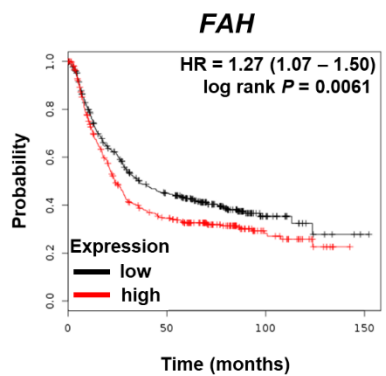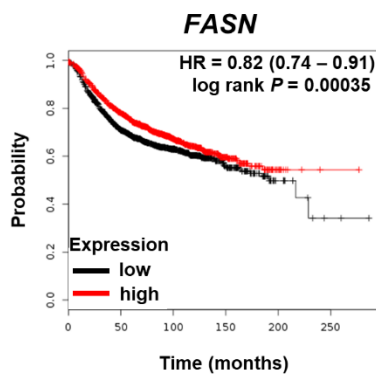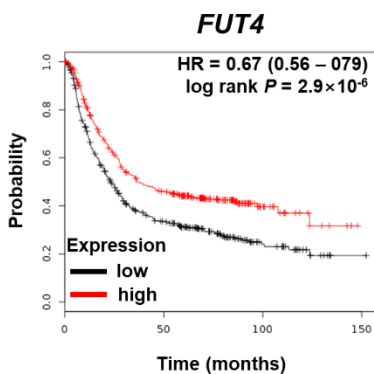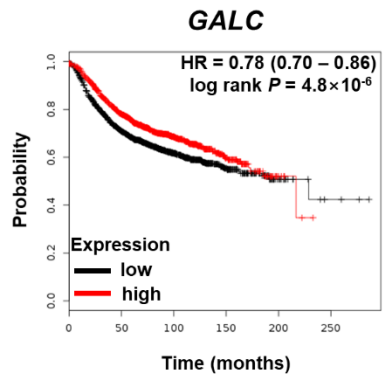

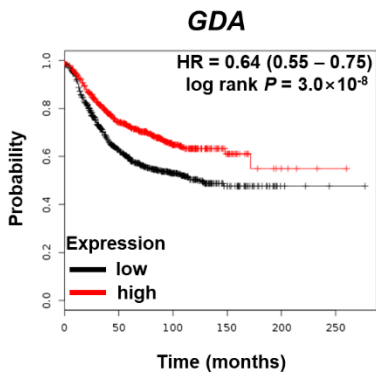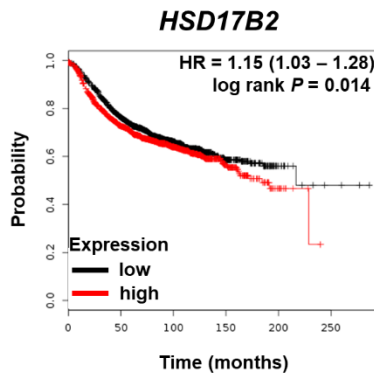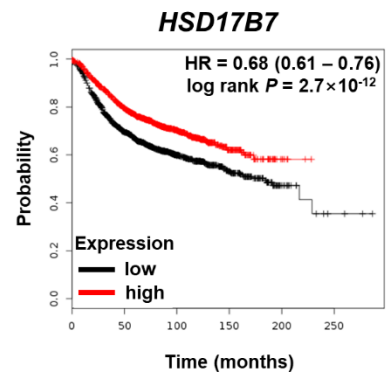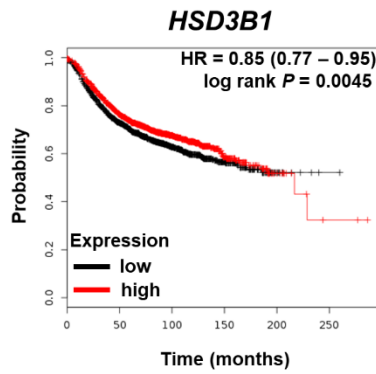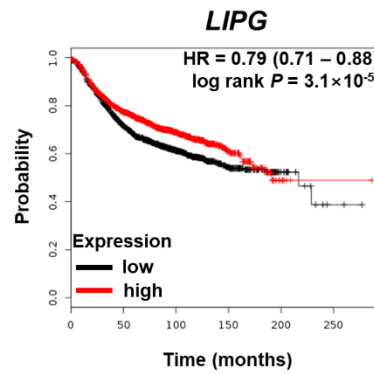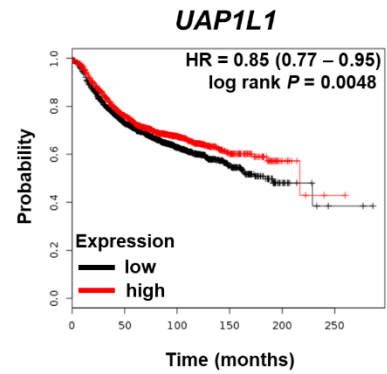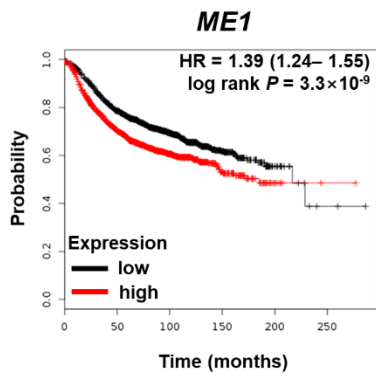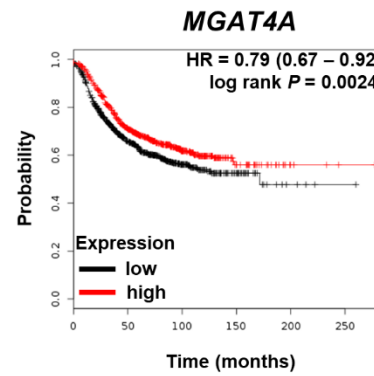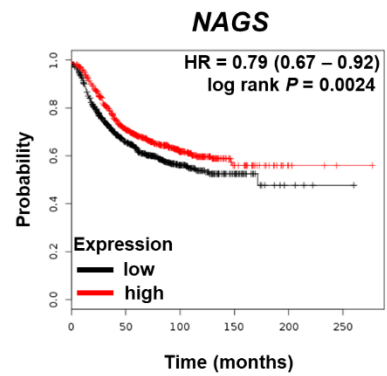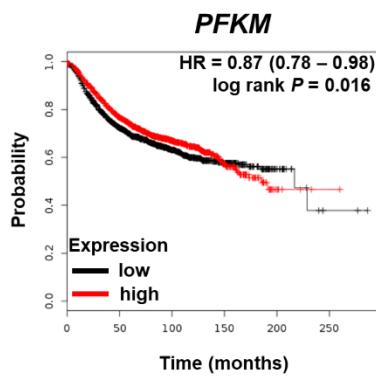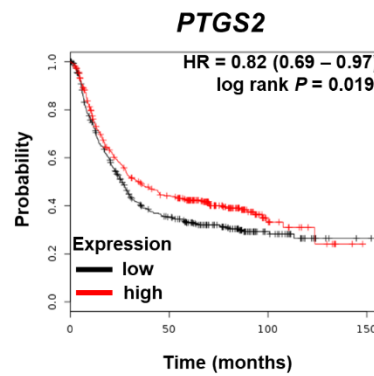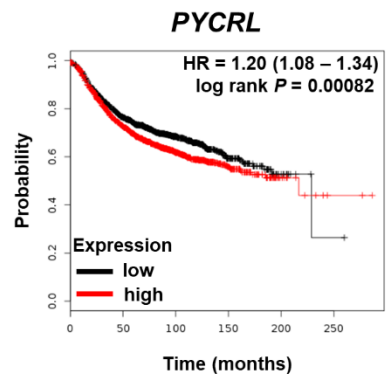

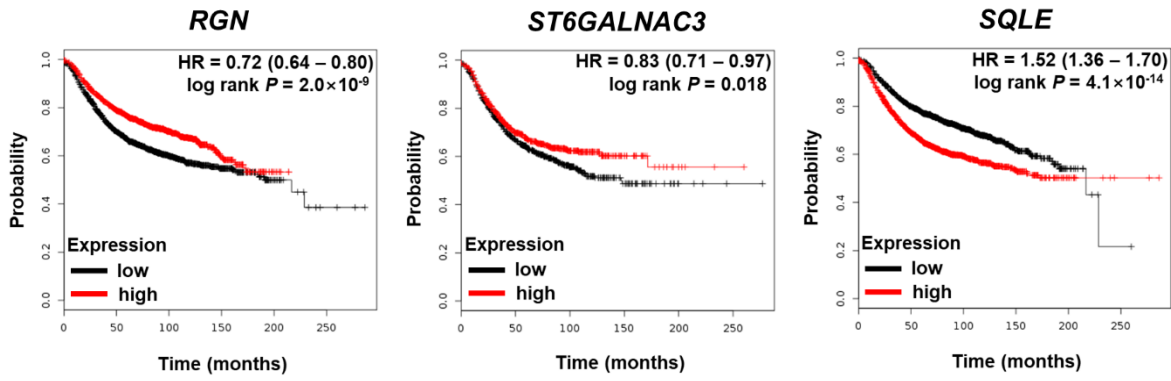

**Figure S2.** Kaplan–Meier survival plots of gastric cancer (GC) for metabolic genes significantly down-regulated in EBVaGC. HR: hazard ratio.

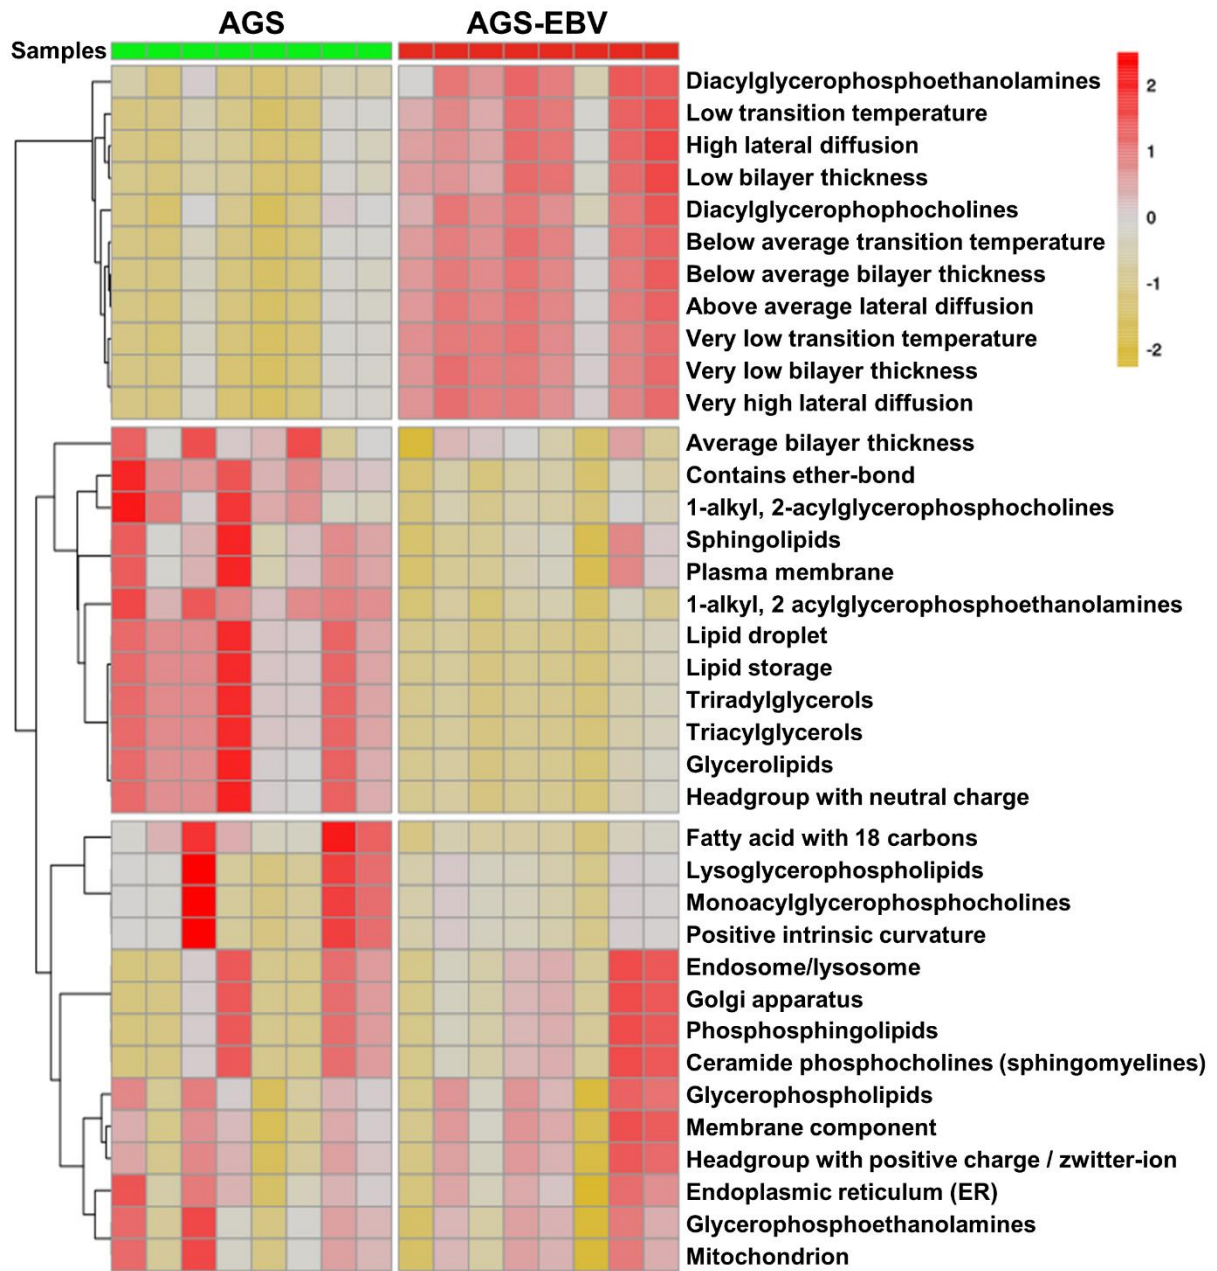

**Figure S3.** Heatmap of pathway enrichment analysis based on lipids significantly altered in EBVaGC.

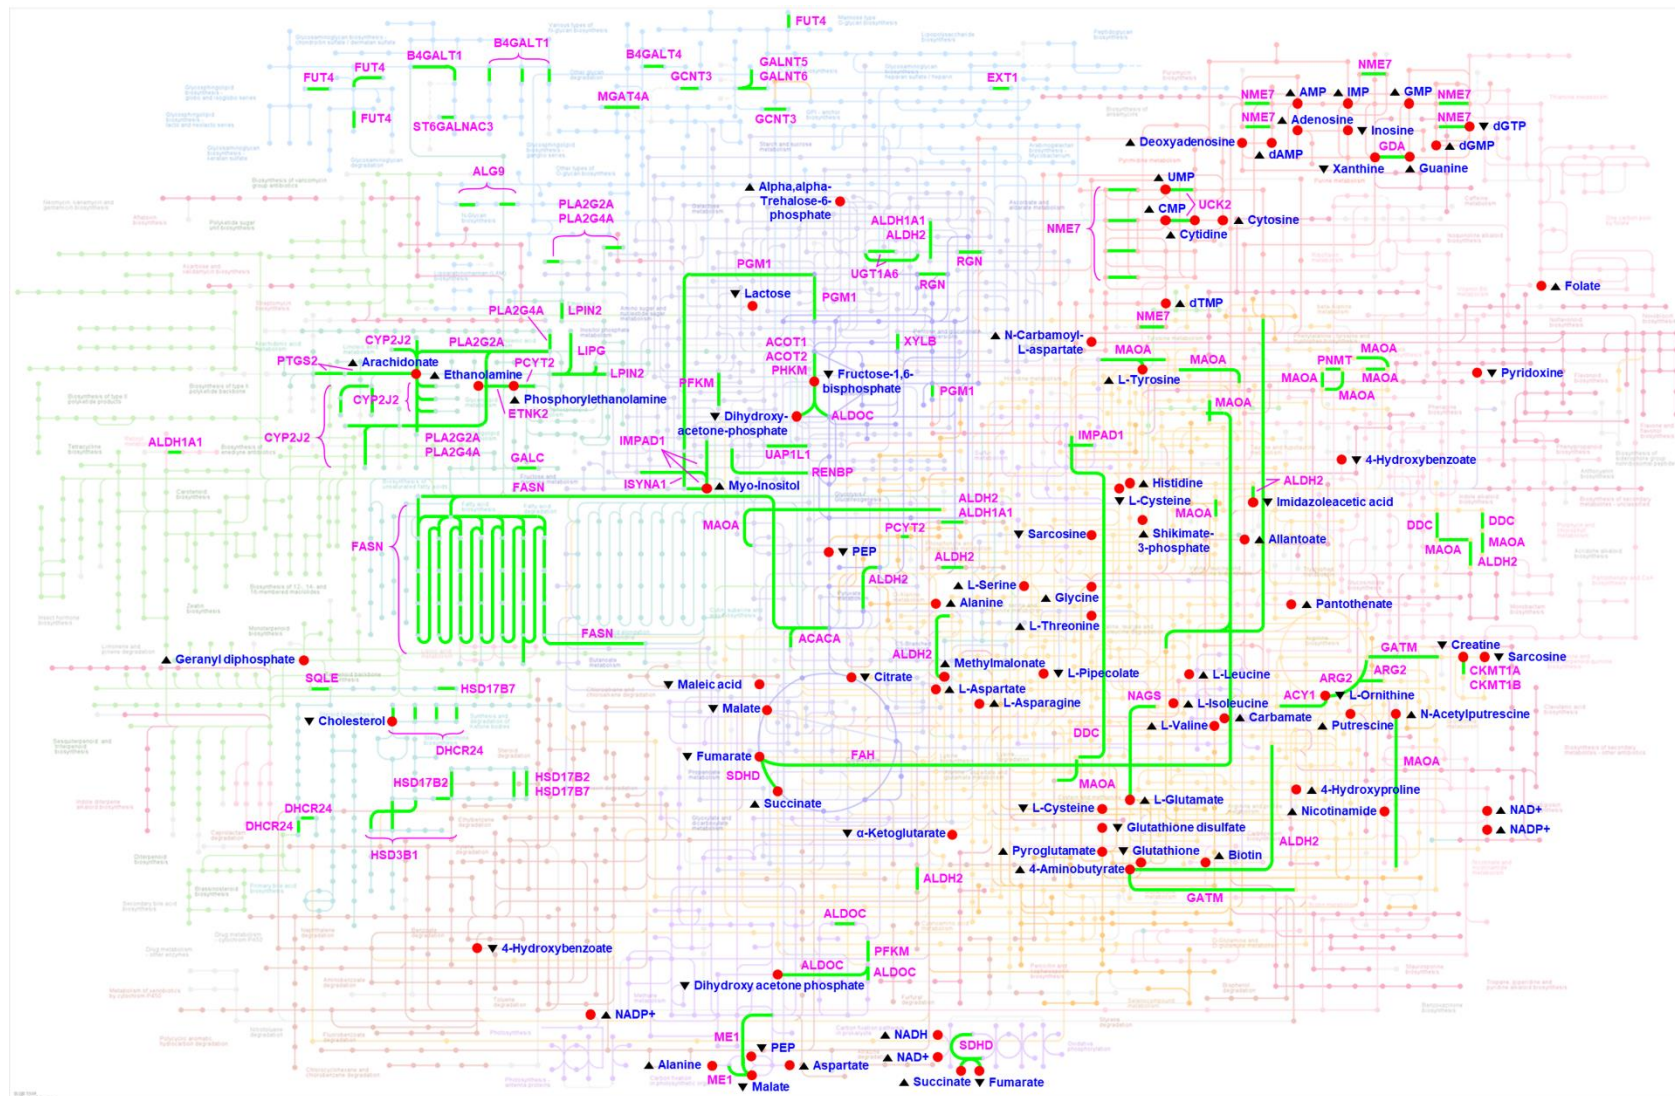

Figure S4. Metabolic pathways with transcripts significantly downregulated and metabolites altered by EBV infection in gastric cancer.
